# Supplementary material for: Ultrasonic-Assisted Synthesis of Twot-Butoxycarbonylamino Cephalosporin Intermediates on SiO2
Source: Hindawi journal article supplement (doi:10.1155/2016/9734108), 2016-01-01
Supplement: f1 [file 9734108.f1.pdf]

# Supporting Information

## Ultrasonic-assisted synthesis of two *t*-butoxycarbonylamino cephalosporin intermediates on SiO<sub>2</sub>

Feng Xue<sup>a</sup>, Yibin Wei<sup>b</sup>, Shengui Ju<sup>a,\*</sup>, Weihong Xing<sup>a</sup>

<sup>a</sup> College of Chemical Engineering, Nanjing Tech University, Nanjing, 210009, People's Republic of China

\*Corresponding author: Prof. Shengui Ju,

E-mail address: [jushengui@njtech.edu.cn](mailto:jushengui@njtech.edu.cn)

<sup>b</sup> Department of Environmental Sciences, Macquarie University, Sydney, NSW 2109, Australia

### Table of Contents

|                                                 |        |
|-------------------------------------------------|--------|
| 1 General Information.....                      | S2     |
| 2 Synthesis of <b>4a</b> and <b>4b</b> .....    | S2-S4  |
| 3 Spectra .....                                 | S5-S10 |
| <sup>1</sup> H-NMR spectrum of <b>4a</b> .....  | S5     |
| <sup>1</sup> H-NMR spectrum of <b>4b</b> .....  | S6     |
| <sup>13</sup> C-NMR spectrum of <b>4a</b> ..... | S7     |
| <sup>13</sup> C-NMR spectrum of <b>4b</b> ..... | S8     |
| HRMS (ES) spectrum of <b>4a</b> .....           | S9     |
| HRMS (ES) spectrum of <b>4b</b> .....           | S10    |

## General information

ACLE.HCl and ACLH.HCl were purchased from Shanghai Arbor Chemical Co., Ltd. The other reagents and solvents were obtained from Sigma-Aldrich and used as received without any further purification. All reactions were monitored by thin layer chromatography (TLC) using commercial silica gel plates. JL-120DTH ultrasonic bath was purchased from Shanghai J & L Science Instrument Co., Ltd. The purity was measured by high performance liquid chromatography (HPLC) on Agilent 1,100 series. The liquid chromatographic system equipped with an ODS-3 C18 column (GL Science Co. Ltd., 180×4.6 mm i.d., 5.0 μm). Melting points were observed on YRT-3 Melting Point Tester and were uncorrected. NMR spectra were determined on Bruker AV300 in DMSO-*d*<sub>6</sub> with TMS as internal standard for <sup>1</sup>H NMR (300 MHz) and <sup>13</sup>C NMR (75 MHz), respectively. HRMS were carried out on an Agilent 6230-LC/TOF MS mass spectrometer.

Synthesis of 4-Methoxyphenyl 7β-*t*-butyl-carbonylamino-3-chloromethyl-3-cephem-4-carboxylate (**4a**):

20.25g (0.05mol) p-Methoxybenzyl 7β-amino-3-chloromethyl-3-cephem-4-carboxylate hydrochloride (**5a**, ACLE.HCl) was dissolved into 200 mL dichloromethane in a flask with mechanical stirring under ice cooling at 0-5°C. Then 10.2 g (0.10 mol) triethylamine was introduced into the mixture to neutralize the pH at 7-8 for 15min before adding 10 g SiO<sub>2</sub> and 13.1 g (0.06 mol) Boc<sub>2</sub>O into the flask under ultrasonic bath at 0-5°C. The reaction lasted for 30 mins at room temperature. When the raw material (**5a**) completely disappeared and transformed as indicated by

TLC, the mixture was poured into 500 mL water, following by washing with brine water for organic phase. Next, the organic phase was dried with anhydrous sodium sulfate and the solvent was evaporated by vacuum to produce the crude product (**4a**). Finally, the crude products were purified by column chromatography to obtain the pure white amorphous powders (2.27 g, yield 96.0%). HPLC assay confirmed the purity of **4a** was 98.5%. The column oven temperature was set at 295 K. The mobile phase was consisted of methanol and deionized water (75:25, v/v) and flowed through the column in 15 min with the flow rate of 1.0 mL/min. Photodiode array detection was used to detect the Boc-ACLE (or Boc-ACLH) at the wavelength of 254 nm. <sup>1</sup>H and <sup>13</sup>C NMR refer to table 3 and 4 [1]. ESI-HRMS: calcd. for C<sub>21</sub>H<sub>24</sub>ClN<sub>2</sub>O<sub>6</sub>S ([M-H]<sup>-</sup>) 467.1049, found 467.1045.

Synthesis of Benzhydryl 7β-*t*-butoxycarbonylamino-3-chloromethyl-3-cephem-4-carboxylate (**4b**):

The **4b** compound was prepared according to a similar manner to that of the **4a** but using the **5b** (ACLH.HCl) as raw material. The weight of purified product was 5.0 g (yield 96.2%). The purity of **4b** was 98.1%. (The HPLC method was similar to the **4a**). m.p. 140-142°C (decomposed). <sup>1</sup>H NMR refer to Table 5 [2]. <sup>13</sup>C NMR (75 MHz, DMSO-d<sub>6</sub>): δ 170.86, 165.01, 161.06, 159.34, 135.70, 130.25, 28.93, 128.16, 126.84, 126.43, 125.29, 124.83, 113.77, 67.28, 59.18, 57.96, 57.86, 55.06, 43.72, 41.55, 40.33, 26.09. ESI-HRMS: calcd. for C<sub>26</sub>H<sub>27</sub>ClN<sub>2</sub>O<sub>5</sub>NaS ([M+Na]<sup>+</sup>) 537.1221, found 537.1243.

## References

- [1] Mijoon L.; Dusan H.; Maxim S.; Wenlin L.; Sergei V.; Shahriar M. *J. Amer. Chem. Soc.* **2003**, *125*, 16322-16326.
- [2] Dai X. Y.; Li. L. W.; Guo. P.; Sun C. H. *Chinese J. Pharmaceut.* **2009**, *40*, 16-18.

### 3. Spectra

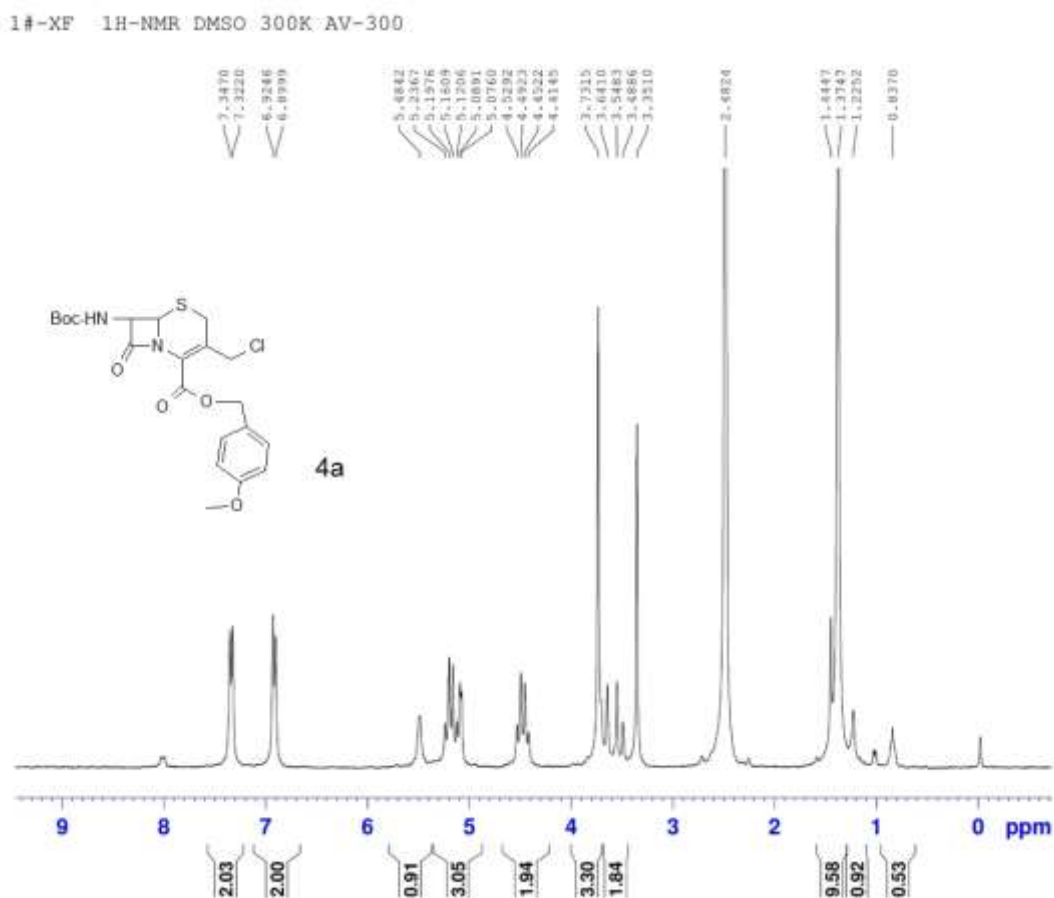

Figure S1. <sup>1</sup>H-NMR spectral image of Boc-ACLE

2#-XF 1H-NMR DMSO 300K AV-300

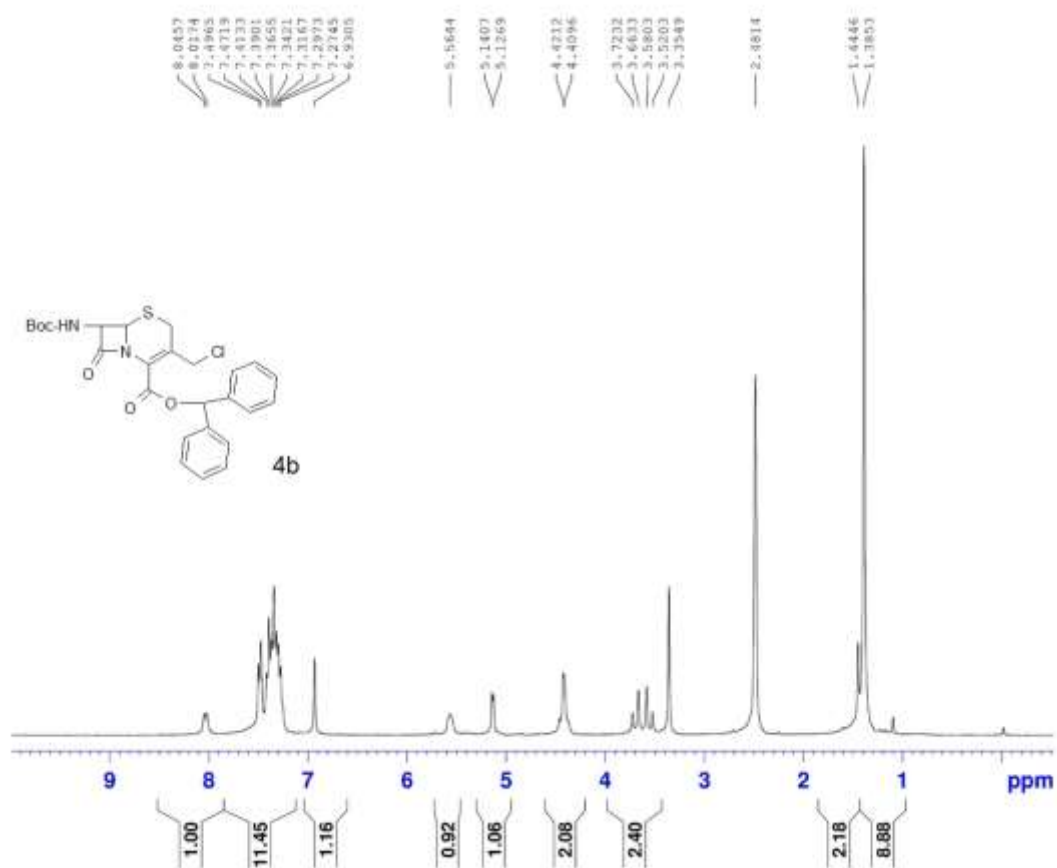

Figure S2. <sup>1</sup>H-NMR spectral image of Boc-ACLH

(4a)

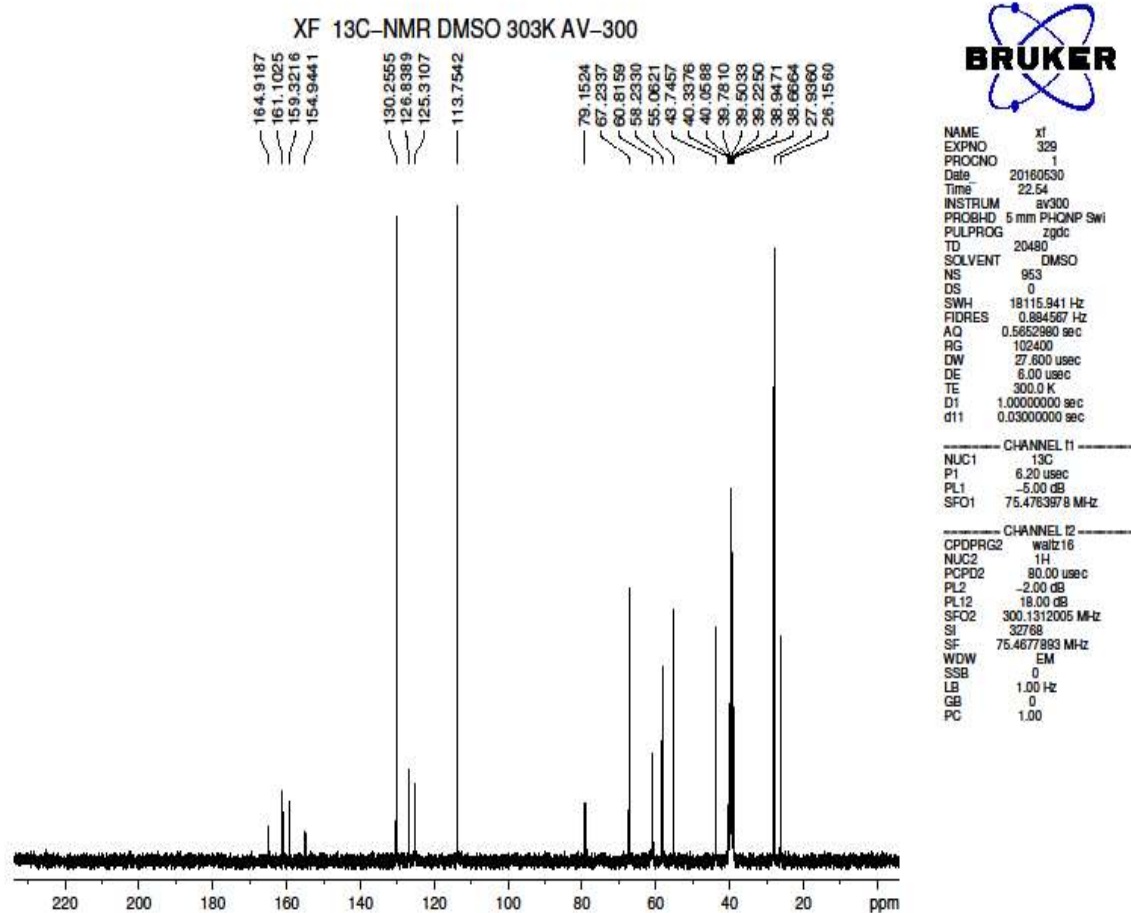

(4b)

Boc-ACLH <sup>13</sup>C-NMR DMSO 303K AV-300

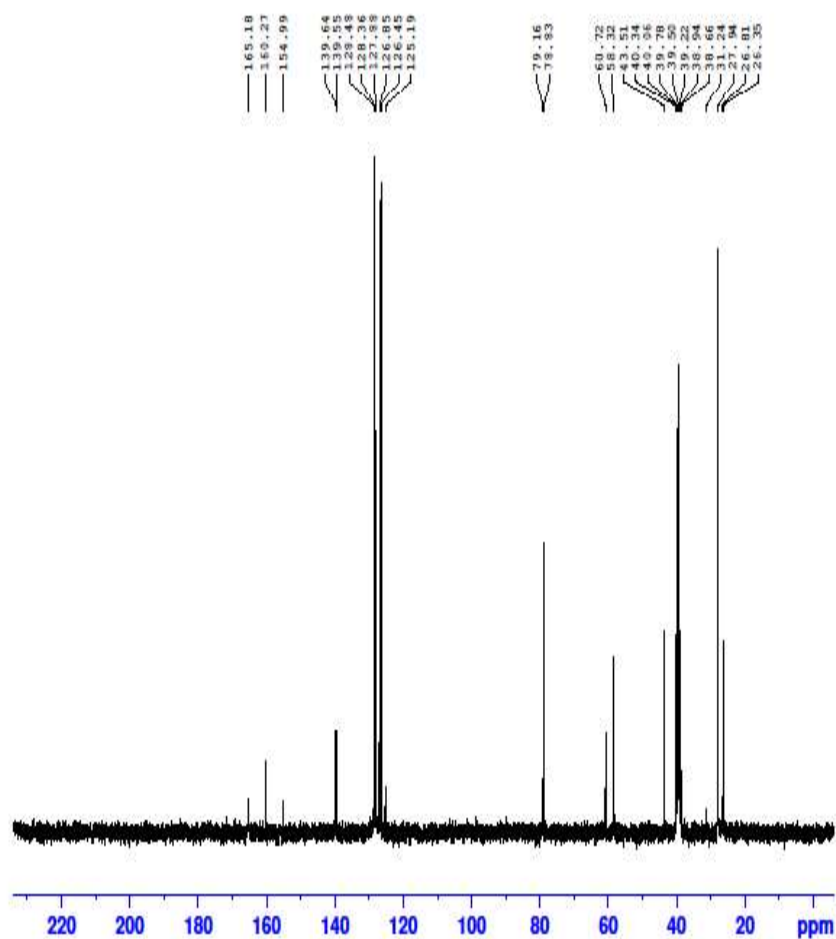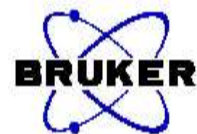

NAME PY-FID  
EXPNO 288  
PROCNO 1  
Date\_ 20160517  
Time 20.10  
INSTRUM av300  
PROBHD 5 mm PHQPZ Swi  
PULPROG zgpg30  
TD 20480  
SOLVENT DMSO  
NS 1243  
DS 0  
SWH 18115.941 Hz  
FIDRES 0.884567 Hz  
AQ 0.5652980 sec  
RG 102400  
DW 27.600 usec  
DE 6.00 usec  
TE 300.0 K  
D1 1.00000000 sec  
d11 0.03000000 sec

----- CHANNEL f1 -----  
NUC1 <sup>13</sup>C  
P1 6.20 usec  
PL1 -5.00 dB  
SFO1 75.4763978 MHz

----- CHANNEL f2 -----  
CPDPRG2 waltz16  
NUC2 <sup>1</sup>H  
PCPD2 80.00 usec  
PL2 -2.00 dB  
PL12 18.00 dB  
SFO2 300.1312005 MHz  
SI 32768  
SF 75.4677894 MHz  
WDW EM  
SSB 0  
LB 1.00 Hz  
GB 0  
PC 1.00

(4a)

## Qualitative Analysis Report

Data Filename: XF-.d Sample Name: XF  
Sample Type: Sample Position: Vial 23  
Instrument Name: Instrument 1 User Name:  
Acq Method: 0601.m Acquired Time: 6/1/2016 8:58:02 PM  
IRM Calibration Status: Success DA Method: Default.m  
Comment:

Sample Group: Info.  
Stream Name: LC 1 Acquisition SW: 6200 series TOF/6500 series  
Version: Q-TOF B.06.01 (B6157)

### User Spectra

Fragmentor Voltage: 130 Collision Energy: 0 Ionization Mode: ESI

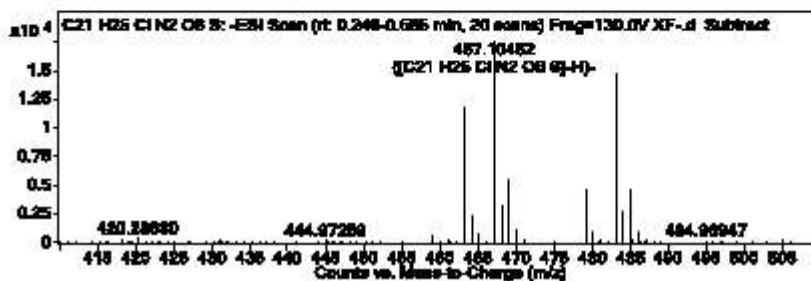

#### Peak List

| m/z       | z | Abund    | Formula            | Ion    |
|-----------|---|----------|--------------------|--------|
| 197.06833 |   | 3391.76  |                    |        |
| 255.23315 | 1 | 5148.69  |                    |        |
| 283.26442 | 1 | 4150.53  |                    |        |
| 407.0916  | 1 | 10089.36 |                    |        |
| 463.15409 | 1 | 11837.37 |                    |        |
| 467.10482 | 1 | 17586.93 | C21 H25 Cl N2 O6 S | (M-H)- |
| 469.10223 | 1 | 5540.29  | C21 H25 Cl N2 O6 S | (M-H)- |
| 479.14878 | 1 | 4564.1   |                    |        |
| 483.09924 | 1 | 14709.62 |                    |        |
| 485.0973  | 1 | 4643.71  |                    |        |

#### Formula Calculator Element Limits

| Element | Min | Max |
|---------|-----|-----|
| C       | 15  | 25  |
| H       | 20  | 30  |
| O       | 5   | 7   |
| Cl      | 0   | 2   |
| S       | 0   | 2   |
| N       | 1   | 3   |

#### Formula Calculator Results

| Formula            | Best  | Mass     | Tgt Mass | Diff (ppm) | Ion Species        | Calculated Mz |
|--------------------|-------|----------|----------|------------|--------------------|---------------|
| C21 H25 Cl N2 O6 S | TRUE  | 468.1118 | 468.1122 | 0.82       | C21 H24 Cl N2 O6 S | 467.10491     |
| C24 H21 Cl N2 O6   | FALSE | 468.1116 | 468.1088 | -6.03      | C24 H20 Cl N2 O6   | 467.10154     |
| C21 H24 Cl2 N3 O5  | FALSE | 468.1119 | 468.1093 | -5.49      | C21 H23 Cl2 N3 O5  | 467.10202     |

--- End Of Report ---

(4b)

## Qualitative Analysis Report

|                        |              |                |                             |
|------------------------|--------------|----------------|-----------------------------|
| Data Filename          | 3.d          | Sample Name    | 3                           |
| Sample Type            | Sample       | Position       | Vial 2                      |
| Instrument Name        | Instrument 1 | User Name      |                             |
| Acq Method             | 0519-1.m     | Acquired Time  | 5/21/2016 3:32:27 PM        |
| IRM Calibration Status | Success      | DA Method      | Default.m                   |
| Comment                |              |                |                             |
| Sample Group           |              | Info.          |                             |
| Stream Name            | LC 1         | Acquisition SW | 6200 series TOF/6500 series |
|                        |              | Version        | Q-TOF B.06.01 (B6157)       |

### User Spectra

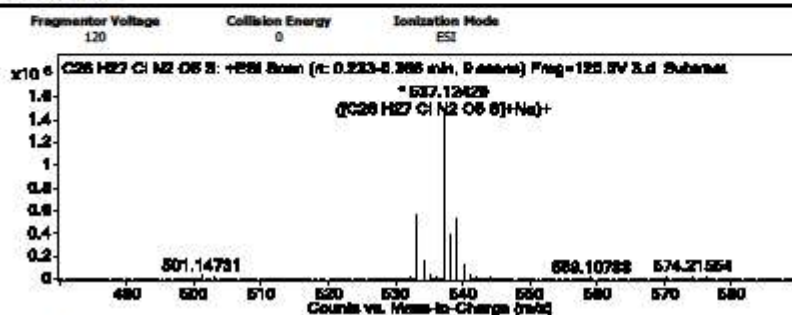

#### Peak List

| m/z       | z | Abund      | Formula            | Ion     |
|-----------|---|------------|--------------------|---------|
| 475.32744 | 1 | 396230.19  |                    |         |
| 533.17359 | 1 | 560162.5   |                    |         |
| 537.12429 | 1 | 1480055.13 | C26 H27 Cl N2 O5 S | (M+Na)+ |
| 538.12737 | 1 | 385627.34  | C26 H27 Cl N2 O5 S | (M+Na)+ |
| 539.12226 | 1 | 538139     | C26 H27 Cl N2 O5 S | (M+Na)+ |

#### Formula Calculator Element Limits

| Element | Min | Max |
|---------|-----|-----|
| C       | 20  | 30  |
| H       | 20  | 30  |
| O       | 4   | 8   |
| N       | 0   | 4   |
| Cl      | 0   | 3   |
| S       | 0   | 3   |

#### Formula Calculator Results

| Formula             | Best  | Mass     | Tgt Mass | Diff (ppm) | Ion Species            | Calculated Mz |
|---------------------|-------|----------|----------|------------|------------------------|---------------|
| C26 H27 Cl N2 O5 S  | TRUE  | 514.135  | 514.1329 | -4.11      | C26 H27 Cl N2 Na O5 S  | 537.12214     |
| C23 H30 Cl2 N3 O4 S | FALSE | 514.1353 | 514.1334 | -3.61      | C23 H30 Cl2 N3 Na O4 S | 537.12263     |

— End Of Report —
